# Supplementary material for: Short-Term Changes in Arterial Stiffness Measured by 2D Speckle Tracking in Patients Undergoing Transcatheter Aortic Valve Implantation
Source: MDPI journal article supplement (doi:10.3390/jcm13010222), 2023-12-30
Supplement: s1 [file s1]

## Supplementary materials

Table S1: Pearson correlation matrix of stiffness indices circumferential strain (CS), strain rate (CSR), normalized stiffness index  $\beta_{\text{area}}$ , arterial pulse wave velocity (aPWV), augmentation index normalized to heart rate (Alx@75) and patient characteristics, hemodynamic parameters and laboratory parameters in patients with aortic stenosis (AS) undergoing transcatheter aortic valve implantation (TAVI).

|                                                             | Pre-CS (%) | Post-CS (%) | $\Delta$ CS (%) | Pre-CSR<br>(1/s) | Post-CSR<br>(1/s) | $\Delta$ CSR (1/s) | Pre- $\beta_{\text{area}}$ | Post- $\beta_{\text{area}}$ | $\Delta\beta_{\text{area}}$ |
|-------------------------------------------------------------|------------|-------------|-----------------|------------------|-------------------|--------------------|----------------------------|-----------------------------|-----------------------------|
| Age (years)                                                 | -0.32*     | -0.10       | 0.29            | -0.25            | -0.11             | 0.22               | 0.25                       | 0.23                        | -0.37*                      |
| BMI (kg/m <sup>2</sup> )                                    | 0.03       | -0.23       | -0.32*          | 0.25             | -0.19             | -0.34*             | -0.05                      | 0.05                        | 0.16                        |
| AVA (mm <sup>2</sup> ) <sup>a</sup>                         | 0.14       | -0.15       | -0.32*          | 0.06             | -0.10             | -0.24              | -0.07                      | -0.08                       | 0.07                        |
| Pre-HR (bpm)                                                | -0.44*     | -0.20       | 0.20            | -0.13            | -0.11             | -0.01              | 0.21                       | -0.03                       | -0.37*                      |
| Post-HR (bpm)                                               | -0.38*     | -0.32*      | 0.019           | 0.02             | -0.15             | -0.12              | 0.22                       | 0.02                        | -0.18                       |
| $\Delta$ HR (bpm)                                           | 0.19       | -0.06       | -0.25           | 0.16             | -0.05             | -0.14              | -0.01                      | 0.03                        | 0.28                        |
| Pre-MAP (mmHg)                                              | 0.08       | 0.21        | 0.075           | 0.18             | 0.16              | 0.04               | -0.01                      | -0.09                       | -0.10                       |
| Post-MAP (mmHg)                                             | 0.26       | 0.11        | -0.33*          | 0.24             | 0.04              | -0.22              | -0.23                      | -0.24                       | 0.03                        |
| $\Delta$ MAP (mmHg)                                         | 0.11       | -0.15       | -0.31*          | 0.02             | -0.17             | -0.20              | -0.13                      | -0.01                       | 0.10                        |
| Pre-PVel (m/sec)                                            | 0.01       | 0.21        | 0.13            | 0.09             | 0.19              | 0.24               | 0.07                       | -0.01                       | -0.04                       |
| Post-PVel (m/sec)                                           | 0.05       | -0.08       | -0.15           | 0.20             | -0.04             | -0.13              | -0.11                      | -0.07                       | 0.09                        |
| $\Delta$ PVel (m/sec)                                       | 0.01       | -0.29       | -0.21           | -0.03            | -0.26             | -0.33*             | -0.12                      | 0.01                        | 0.10                        |
| Pre-MaxPG (mmHg)                                            | -0.03      | 0.10        | 0.12            | 0.03             | 0.02              | 0.20               | 0.10                       | 0.11                        | -0.06                       |
| Post-MaxPG (mmHg)                                           | 0.10       | -0.11       | -0.32*          | 0.20             | -0.09             | -0.26              | -0.11                      | -0.10                       | 0.16                        |
| $\Delta$ MaxPG (mmHg)                                       | 0.06       | -0.20       | -0.25           | -0.03            | -0.15             | -0.31*             | -0.13                      | -0.12                       | 0.13                        |
| Pre-MPG (mmHg)                                              | 0.01       | 0.24        | 0.14            | 0.12             | 0.23              | 0.24               | 0.06                       | -0.10                       | -0.10                       |
| Post-MPG (mmHg)                                             | 0.16       | -0.06       | -0.31           | 0.24             | -0.03             | -0.22              | -0.09                      | -0.08                       | 0.03                        |
| $\Delta$ MPG (mmHg)                                         | 0.02       | -0.32       | -0.24           | -0.10            | -0.32*            | -0.34*             | -0.05                      | 0.12                        | 0.04                        |
| Pre-Cardiac index<br>(l/min*1/m <sup>2</sup> ) <sup>a</sup> | -0.06      | 0.11        | 0.16            | -0.01            | 0.17              | 0.14               | 0.05                       | -0.15                       | -0.39*                      |

|                                                                                    |       |       |       |       |       |       |       |       |        |
|------------------------------------------------------------------------------------|-------|-------|-------|-------|-------|-------|-------|-------|--------|
| <b>Post-Cardiac index</b><br><b>(l/min*1/m<sup>2</sup>)<sup>a</sup></b>            | -0.02 | 0.19  | 0.10  | 0.02  | 0.12  | 0.14  | -0.07 | -0.14 | -0.10  |
| <b>Δ-Cardiac index</b><br><b>(l/min*1/m<sup>2</sup>)</b>                           | 0.11  | 0.03  | -0.16 | 0.10  | -0.06 | -0.12 | -0.12 | 0.10  | 0.37*  |
| <b>Pre-Total vascular</b><br><b>resistance (dyn·s/cm<sup>5</sup>)<sup>a</sup></b>  | 0.14  | 0.15  | -0.01 | 0.06  | 0.09  | -0.01 | -0.11 | -0.04 | -0.02  |
| <b>Post-Total vascular</b><br><b>resistance (dyn·s/cm<sup>5</sup>)<sup>a</sup></b> | 0.19  | 0.21  | -0.04 | 0.24  | 0.26  | 0.05  | -0.12 | -0.25 | -0.04  |
| <b>ΔTotal vascular</b><br><b>resistance (dyn·s/cm<sup>5</sup>)</b>                 | -0.01 | -0.07 | -0.01 | 0.09  | 0.04  | -0.02 | 0.02  | -0.06 | 0.08   |
| <b>NT-proBNP (pg/mL)<sup>a</sup></b>                                               | -0.24 | 0.06  | 0.37* | -0.29 | 0.02  | 0.31* | 0.16  | 0.02  | -0.38* |
| <b>Total cholesterol</b><br><b>(mg/dL)<sup>a</sup></b>                             | 0.19  | 0.19  | 0.09  | 0.17  | 0.15  | 0.02  | -0.03 | -0.16 | -0.15  |
| <b>Triglycerides (mg/dL)<sup>a</sup></b>                                           | -0.01 | 0.07  | 0.16  | -0.04 | 0.09  | 0.09  | 0.02  | -0.13 | -0.14  |
| <b>LDL-Cholesterol</b><br><b>(mg/dL)<sup>a</sup></b>                               | 0.13  | 0.13  | 0.08  | 0.066 | 0.07  | 0.03  | -0.01 | -0.16 | -0.17  |
| <b>HDL-Cholesterol</b><br><b>(mg/dL)<sup>a</sup></b>                               | 0.16  | -0.03 | -0.26 | 0.18  | -0.06 | -0.19 | -0.07 | -0.10 | 0.02   |
| <b>Non-HDL-Cholesterol</b><br><b>(mg/dL)<sup>a</sup></b>                           | 0.16  | 0.19  | 0.15  | 0.10  | 0.13  | 0.06  | -0.01 | -0.15 | -0.19  |
| <b>Sex<sup>b</sup></b>                                                             | 0.16  | 0.21  | 0.10  | 0.18  | 0.18  | -0.06 | 0.02  | -0.17 | -0.09  |
| <b>Diabetes<sup>b</sup></b>                                                        | -0.01 | 0.14  | 0.09  | 0.11  | 0.20  | 0.23  | -0.23 | -0.02 | 0.18   |

<sup>a</sup>Spearman correlation coefficient

<sup>b</sup>Point-biserial correlation coefficient

\*p < 0.05

Table S1 continued

|                                                                        | Pre-aPWV (m/s) | Post-aPWV (m/s) | $\Delta$ aPWV (m/s) | Pre-AIx@75 (%) | Post-AIx@75 (%) | $\Delta$ AIx@75 (%) |
|------------------------------------------------------------------------|----------------|-----------------|---------------------|----------------|-----------------|---------------------|
| Age (years)                                                            | 0.89*          | 0.90*           | -0.20               | 0.04           | -0.04           | -0.17               |
| BMI (kg/m <sup>2</sup> )                                               | -0.19          | -0.15           | 0.16                | 0.10           | 0.03            | -0.05               |
| AVA (mm <sup>2</sup> ) <sup>a</sup>                                    | -0.18          | -0.21           | 0.02                | -0.02          | 0.05            | 0.10                |
| Pre-HR (bpm)                                                           | -0.06          | -0.05           | 0.07                | 0.04           | 0.19            | 0.14                |
| Post-HR (bpm)                                                          | -0.26          | -0.32*          | 0.04                | -0.23          | 0.28            | 0.36*               |
| $\Delta$ HR (bpm)                                                      | -0.24          | -0.29           | -0.04               | -0.28          | 0.02            | 0.20                |
| Pre-MAP (mmHg)                                                         | 0.29           | -0.07           | -0.62*              | 0.15           | -0.12           | -0.25               |
| Post-MAP (mmHg)                                                        | -0.12          | 0.19            | 0.49*               | 0.10           | 0.14            | -0.08               |
| $\Delta$ MAP (mmHg)                                                    | -0.30          | 0.27            | 0.90*               | 0.03           | 0.25            | 0.15                |
| Pre-PVel (m/sec)                                                       | 0.17           | 0.03            | -0.04               | 0.28           | -0.18           | -0.33               |
| Post-PVel (m/sec)                                                      | -0.04          | -0.02           | 0.26                | -0.03          | -0.02           | 0.04                |
| $\Delta$ PVel (m/sec)                                                  | -0.17          | 0.02            | 0.2                 | -0.25          | 0.03            | 0.27                |
| Pre-MaxPG (mmHg)                                                       | 0.14           | -0.02           | -0.13               | 0.24           | -0.23           | -0.39*              |
| Post-MaxPG (mmHg)                                                      | -0.11          | -0.01           | 0.36*               | 0.02           | 0.05            | 0.04                |
| $\Delta$ MaxPG (mmHg)                                                  | -0.18          | 0.01            | 0.28                | -0.23          | 0.14            | 0.36*               |
| Pre-MPG (mmHg)                                                         | 0.15           | 0.04            | -0.09               | 0.24           | -0.14           | -0.34*              |
| Post-MPG (mmHg)                                                        | -0.01          | 0.02            | 0.26                | 0.08           | -0.04           | -0.01               |
| $\Delta$ MPG (mmHg)                                                    | -0.21          | -0.10           | 0.08                | -0.29          | 0.08            | 0.40*               |
| Pre-Cardiac index<br>(l/min*1/m <sup>2</sup> ) <sup>a</sup>            | 0.04           | -0.04           | -0.25               | -0.36*         | 0.28            | 0.47*               |
| Post-Cardiac index<br>(l/min*1/m <sup>2</sup> ) <sup>a</sup>           | -0.20          | -0.10           | 0.12                | 0.01           | -0.09           | -0.14               |
| $\Delta$ -Cardiac index<br>(l/min*1/m <sup>2</sup> )                   | -0.20          | -0.09           | 0.36                | 0.44*          | -0.38*          | -0.59*              |
| Pre-Total vascular<br>resistance (dyn·s/cm <sup>5</sup> ) <sup>a</sup> | 0.11           | 0.03            | -0.20               | 0.57*          | -0.17           | -0.57*              |

|                                                                          |       |       |       |        |       |       |
|--------------------------------------------------------------------------|-------|-------|-------|--------|-------|-------|
| <b>Post-Total vascular resistance (dyn·s/cm<sup>5</sup>)<sup>a</sup></b> | -0.20 | -0.06 | 0.07  | 0.05   | 0.51* | 0.32  |
| <b>ΔTotal vascular resistance (dyn·s/cm<sup>5</sup>)</b>                 | -0.17 | 0.01  | 0.25  | -0.37* | 0.48* | 0.70* |
| <b>NT-proBNP (pg/mL)<sup>a</sup></b>                                     | 0.43* | 0.50* | 0.09  | -0.13  | -0.02 | 0.10  |
| <b>Total cholesterol (mg/dL)<sup>a</sup></b>                             | 0.06  | -0.01 | -0.09 | 0.33   | 0.15  | -0.09 |
| <b>Triglycerides (mg/dL)<sup>a</sup></b>                                 | -0.10 | -0.01 | -0.01 | 0.17   | 0.03  | 0.09  |
| <b>LDL-Cholesterol (mg/dL)<sup>a</sup></b>                               | 0.18  | 0.05  | -0.15 | 0.26   | -0.01 | -0.17 |
| <b>HDL-Cholesterol (mg/dL)<sup>a</sup></b>                               | -0.18 | -0.20 | 0.20  | 0.14   | 0.19  | -0.09 |
| <b>Non-HDL-Cholesterol (mg/dL)<sup>a</sup></b>                           | 0.21  | 0.08  | -0.23 | 0.27   | 0.04  | -0.10 |
| <b>Sex<sup>b</sup></b>                                                   | -0.21 | -0.25 | -0.07 | 0.22   | 0.52* | 0.24  |
| <b>Diabetes<sup>b</sup></b>                                              | -0.15 | -0.06 | 0.01  | -0.07  | -0.01 | 0.03  |

<sup>a</sup>Spearman correlation coefficient

<sup>b</sup>Point-biserial correlation coefficient

\*p < 0.05

Table S2: Mixed linear regression model with a random intercept for Patient ID and arterial stiffness markers as outcomes variables for patients before and after aortic valve transplantation (TAVI).

| Predictors     | Circumferential strain (%) |                 |                  | Circumferential strain rate (1/s) |                |              | Normalized stiffness index $\beta_{\text{area}}$ |                 |       | Arterial Pulse wave velocity (m/s) |                      |                  | Augmentation index normalized to heart rate Alx@75 (%) |                     |                  |
|----------------|----------------------------|-----------------|------------------|-----------------------------------|----------------|--------------|--------------------------------------------------|-----------------|-------|------------------------------------|----------------------|------------------|--------------------------------------------------------|---------------------|------------------|
|                | Est.                       | CI              | p                | Est.                              | CI             | p            | Est.                                             | CI              | p     | Est.                               | CI                   | p                | Est.                                                   | CI                  | p                |
| (Intercept)    | 18.65                      | 10.48;<br>26.83 | <b>&lt;0.001</b> | 1.45                              | -0.96;<br>3.85 | 0.234        | -<br>2.81                                        | -13.16;<br>7.53 | 0.590 | -<br>8.81                          | -<br>10.03;<br>-7.58 | <b>&lt;0.001</b> | -<br>37.35                                             | -<br>76.55;<br>1.84 | 0.061            |
| Timepoint      | 0.84                       | 0.20;<br>1.47   | <b>0.011</b>     | 0.33                              | 0.14;<br>0.52  | <b>0.001</b> | -<br>0.45                                        | -1.07;<br>0.17  | 0.149 | -<br>0.01                          | -0.11;<br>0.10       | 0.894            | -6.96                                                  | 11.24;<br>-2.69     | <b>0.002</b>     |
| Age (yrs)      | -0.10                      | -0.18;<br>-0.02 | <b>0.017</b>     | -<br>0.00                         | -0.03;<br>0.02 | 0.693        | 0.07                                             | -0.04;<br>0.18  | 0.210 | 0.21                               | 0.19;<br>0.22        | <b>&lt;0.001</b> | 0.29                                                   | -0.06;<br>0.64      | 0.101            |
| Sex (female)   | 1.26                       | 0.10;<br>2.42   | <b>0.033</b>     | 0.26                              | -0.08;<br>0.60 | 0.129        | -<br>0.11                                        | -1.70;<br>1.49  | 0.895 | 0.08                               | -0.09;<br>0.25       | 0.342            | 10.49                                                  | 5.31;<br>15.67      | <b>&lt;0.001</b> |
| HR (bpm)       | -0.08                      | -0.11;<br>-0.04 | <b>&lt;0.001</b> | -<br>0.00                         | -0.01;<br>0.01 | 0.635        | 0.03                                             | -0.01;<br>0.07  | 0.164 | -<br>0.00                          | -0.01;<br>0.00       | 0.321            | 0.12                                                   | -0.07;<br>0.31      | 0.203            |
| MAP (mm Hg)    | -0.01                      | -0.05;<br>0.02  | 0.419            | 0.00                              | -0.01;<br>0.01 | 0.819        | 0.01                                             | -0.03;<br>0.04  | 0.701 | 0.05                               | 0.04;<br>0.05        | <b>&lt;0.001</b> | 0.30                                                   | 0.11;<br>0.49       | <b>0.003</b>     |
| Random Effects |                            |                 |                  |                                   |                |              |                                                  |                 |       |                                    |                      |                  |                                                        |                     |                  |
| $\sigma^2$     | 1.80                       |                 |                  | 0.17                              |                |              | 1.56                                             |                 |       | 0.05                               |                      |                  | 86.65                                                  |                     |                  |
| $\tau_{00}$    | 1.52 Pat_ID                |                 |                  | 0.12 Pat_ID                       |                |              | 3.91 Pat_ID                                      |                 |       | 0.03 Pat_ID                        |                      |                  | 0.00 Pat_ID                                            |                     |                  |
| ICC            | 0.46                       |                 |                  | 0.42                              |                |              | 0.71                                             |                 |       | 0.35                               |                      |                  | 0.08                                                   |                     |                  |
| N              | 44 Pat_ID                  |                 |                  | 44 Pat_ID                         |                |              | 44 Pat_ID                                        |                 |       | 43 Pat_ID                          |                      |                  | 43 Pat_ID                                              |                     |                  |
| Observations   | 84                         |                 |                  | 84                                |                |              | 84                                               |                 |       | 79                                 |                      |                  | 79                                                     |                     |                  |

|                                                            |               |               |               |               |            |
|------------------------------------------------------------|---------------|---------------|---------------|---------------|------------|
| Marginal R <sup>2</sup> /<br>Conditional<br>R <sup>2</sup> | 0.274 / 0.606 | 0.116 / 0.488 | 0.051 / 0.729 | 0.961 / 0.975 | 0.328 / NA |
|------------------------------------------------------------|---------------|---------------|---------------|---------------|------------|

---

Table S3: Patients with atrial fibrillation (paroxysmal and permanent) versus patients without atrial fibrillation arterial stiffness markers before transcatheter aortic valve transplantation (TAVI).

| Pre-TAVI                 |    | Patients with atrial fibrillation |    | Patients without atrial fibrillation |                      |
|--------------------------|----|-----------------------------------|----|--------------------------------------|----------------------|
| Parameter                | N  | Median $\pm$ IQR                  | N  | Median $\pm$ IQR                     | p-value <sup>a</sup> |
| <b>Stiffness indices</b> |    |                                   |    |                                      |                      |
| CS (%)                   | 16 | 4.08 $\pm$ 2.008                  | 28 | 4.69 $\pm$ 2.404                     | 0.652                |
| CSR (1/s)                | 16 | 0.83 $\pm$ 0.481                  | 28 | 0.93 $\pm$ 0.570                     | 0.826                |
| $\beta_{\text{area}}$    | 16 | 5.27 $\pm$ 2.682                  | 27 | 4.99 $\pm$ 2.381                     | 0.418                |
| aPWV (m/s)               | 17 | 12.10 $\pm$ 1.533                 | 21 | 11.57 $\pm$ 1.367                    | 0.106                |
| Alx@75 (%)               | 17 | 25.67 $\pm$ 11.500                | 21 | 32.33 $\pm$ 14.667                   | 0.229                |

<sup>a</sup> p-value calculated by Wilcoxon rank sum test

CS = Circumferential strain. CSR = Circumferential strain rate.  $\beta_{\text{area}}$  = Normalized stiffness index based on area. aPWV = Arterial pulse wave velocity. Alx@75 = Augmentation index normalized to heart rate
